# Supplementary material for: Clinical significance of cytogenetic aberrations in bone marrow of patients with diffuse large B-cell lymphoma: prognostic significance and relevance to histologic involvement
Source: PubMed Central journal article supplement (PMC3851800; doi:10.1186/1756-8722-6-76), 2013-10-03
Supplement: 1756-8722-6-76-S2.pdf [file 1756-8722-6-76-S2.pdf]

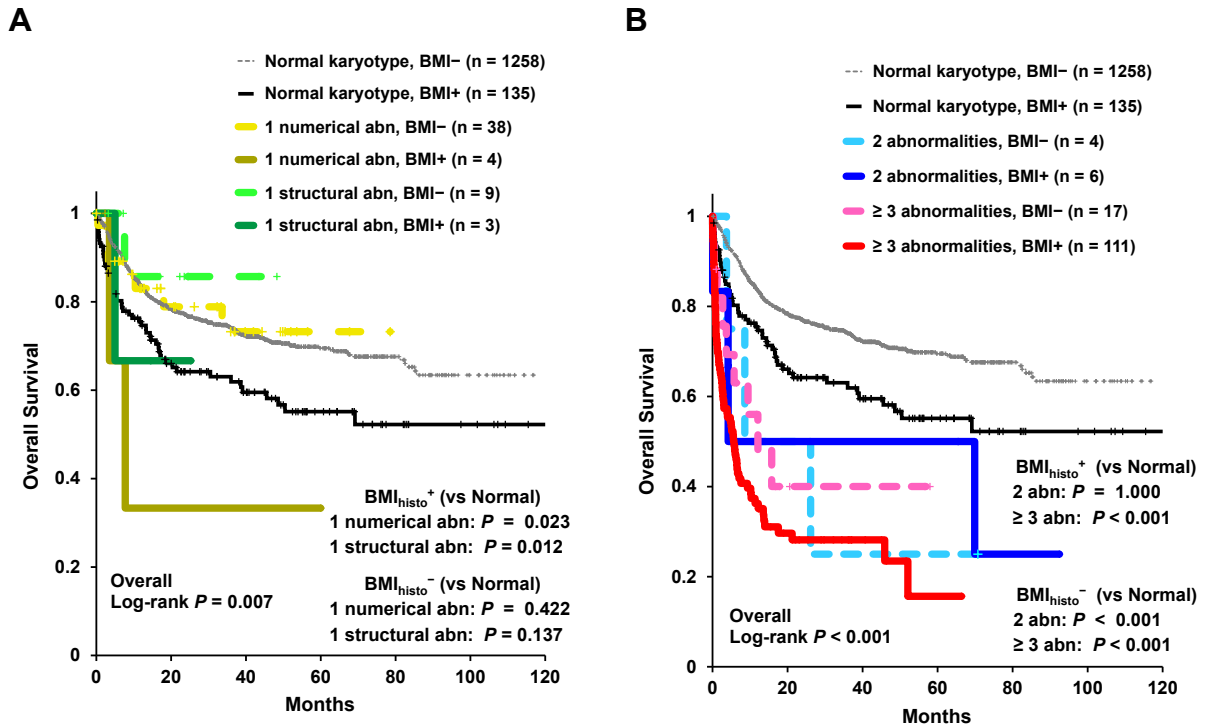

**Supplementary Figure S1.** Kaplan-Meier survival plots of OS according to histologic bone marrow involvement (BMI) and chromosomal abnormalities found in bone marrow cells in DLBCL patients. **(A)** The patients with a single abnormality did not exhibit significant differences in OS in patients without bone marrow involvement (BMI<sub>histo</sub><sup>-</sup>). **(B)** The patients with complex karyotypes ( $\geq 3$  abnormalities) exhibited significantly worse survival in both the BMI<sub>histo</sub><sup>+</sup> and BMI<sub>histo</sub><sup>-</sup> groups.
