# Supplementary material for: Clinical significance of cytogenetic aberrations in bone marrow of patients with diffuse large B-cell lymphoma: prognostic significance and relevance to histologic involvement
Source: PubMed Central journal article supplement (PMC3851800; doi:10.1186/1756-8722-6-76), 2013-10-03
Supplement: 1756-8722-6-76-S4.pdf [file 1756-8722-6-76-S4.pdf]

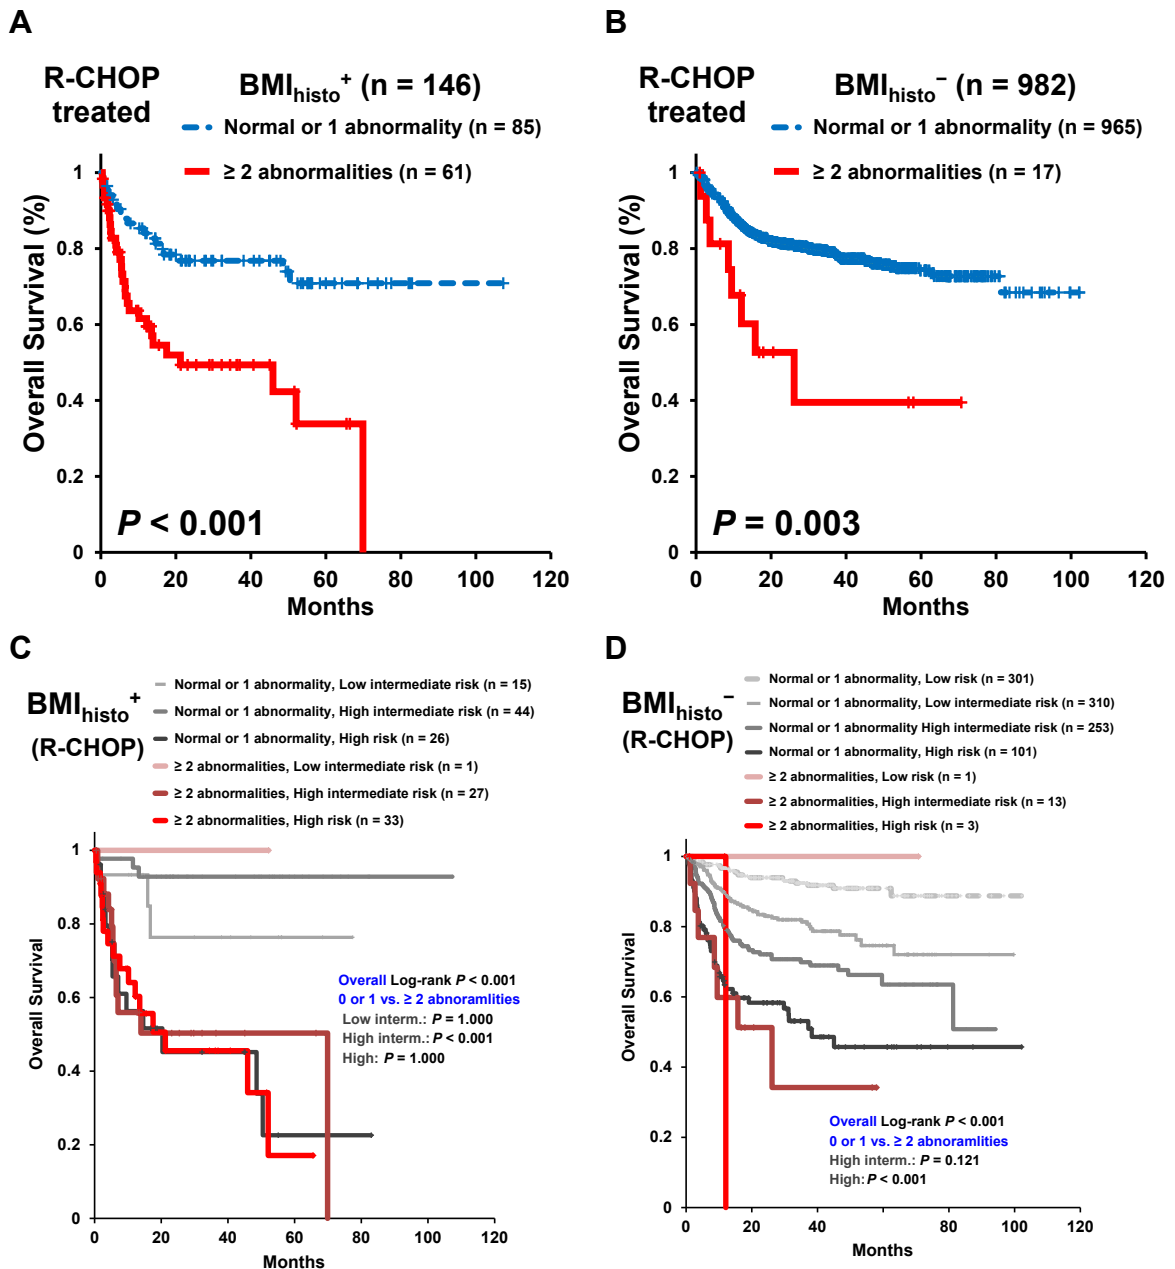

**Supplementary Figure S3.** Kaplan-Meier survival plots of overall survival (OS) of R-CHOP treated DLBCL patients according to chromosomal abnormalities (**A**) in patients with histologic bone marrow involvement (BMI<sub>histo</sub><sup>+</sup>) and (**B**) in patients without histologic bone marrow involvement (BMI<sub>histo</sub><sup>-</sup>). (**C and D**) OS according to risk stratification by international prognostic index scores and chromosomal abnormalities (**C**) in R-CHOP-treated BMI<sub>histo</sub><sup>+</sup> patients and (**D**) in R-CHOP-treated BMI<sub>histo</sub><sup>-</sup> patients.
